# Supplementary material for: Overexpression of Bcl2 in Osteoblasts Inhibits Osteoblast Differentiation and Induces Osteocyte Apoptosis
Source: PLoS One. 2011 Nov 17;6(11):e27487. doi: 10.1371/journal.pone.0027487 (PMC3219663; doi:10.1371/journal.pone.0027487)
Supplement: Table S1 — Primer sequences. (XLS) [file pone.0027487.s004.xls]

## Sheet: Bcl-2 paper
	gene name				sequence			gene name				sequence
	ALP		forward		CGCACGCGATGCAACACCAC			Gapdh		forward		TGCACCACCAACTGCTTAG
			reverse		TGCCCACGGACTTCCCAGCA					reverse		GAACATCATCCCTGCATCC
	apaf1		forward		GTAATGGCGTCTTGTCAGTG			osteocalcin		forward		CGCTCTGTCTCTCTGACCTC
			reverse		CTTGCACTGGAAGACGACAC					reverse		GACTGAGGCTCCAAGGTAGC
	Bad		forward		GACCAGCAGCCCAGAGTATG			osteopontin		forward		GCAGAATCTCCTTGCGCCAC
			reverse		CCTGGCTGGTCCTCAGTGAG					reverse		CGAGTCCACAGAATCCTCGC
	Bax		forward		GTGAGCGGCTGCTTGTCTGG			p15		forward		AGGCGCCCAATCCAGGTCAT
			reverse		CTTCCAGATGGTGAGCGAGG					reverse		CAAGCGTGTCCAGGAAGCCT
	Bcl-2		forward		GAGGATTGTGGCCTTCTTTG			p16		forward		CTGGGTGCTCTTTGTGTTCC
			reverse		CGTTATCCTGGATCCAGGTG					reverse		TGCTTGAGCTGAAGCTATGC
	Bid		forward		GCGATGAGATGGACCACAAC			p18		forward		GGAGATTGCCAGGAGGCTTC
			reverse		CTCTGGGGAAGGCTGTCTTC					reverse		GCAAAGCCTGTACAGTGTCC
	Bik		forward		CCTGCATCGGCGATGAGATG			p19		forward		GAGCTGGTGCATCCTGACGC
			reverse		CTCTGACACCTGTCCGGCTG					reverse		CGGAGGCATCTTGGACATTG
	Bim		forward		CTCCCTACAGACAGAACCGC			p21		forward		TATTTAAGCCCCTCCCAACC
			reverse		CGTTGAACTCGTCTCCGATC					reverse		AGCTGGCCTTAGAGGTGACA
	Bmf		forward		GCTGAGACGCTGTCCTGGAG			p27		forward		CAGAATCATAAGCCCCTGGA
			reverse		CAAACAGGTCAGCAGAGAGC					reverse		TCTGACGAGTCAGGCATTTG
	Casp 3		forward		GACTACTGCCGGAGTCTGAC			p53		forward		GTCGGACAAGCGGCAGATTG
			reverse		GACTGGATGAACCACGACCC					reverse		CCTTCGTCTTAGGGTGAGGC
	Casp 8		forward		GCAGGAGACCATCGAGGATG			Vegf		forward		GGACCCTGGCTTTACTGCTG
			reverse		CACCATCTCCTCTCGGTTGC					reverse		CTCAATCGGACGGCAGTAGC
	Casp 9		forward		GGGTGCTGTCTATGGGACAG
			reverse		GAGGAAGTGCAGGCCACCTC
	CDK6		forward		GCTGGCTGACTTTGGCCTTG
			reverse		CTGGACTGGAGCAGGACTTC
	Col1a1		forward		CCTGGAATGAAGGGACACCG
			reverse		CCATCGTTACCGCGAGCACC
	cul1		forward		GTGCAGACAGTGCTGGATGT
			reverse		CTGCCTCTTCTGGGTTCTTG
	cul2		forward		TGGCAGTTCTTCTTGCCTTT
			reverse		GTGGCGTATCCTTCTGCATT
	cul3		forward		TATTTGGCACGAACACCTGA
			reverse		TGGAAAGCCTGAAGCTCAAT
	Cyclin B1		forward		GGCTGAGACCGAGAACTGCT
			reverse		TCAGGCTCAGCAAGTTCCAC
	Cyclin D1		forward		GGCACCTGGATTGTTCTGTT
			reverse		CAGCTTGCTAGGGAACTTGG
	Cyclin E1		forward		GCTCCGACCTTTCAGTCCGC
			reverse		ATCATCCCAGGGCTGACTGC
	Cyclin G1		forward		AGGTCTGCGGCTTGAAACTA
			reverse		TCAGTCCAACACACCCAAGA
	Table S1
